# Supplementary material for: Nordic microalgae immobilized to a sulfur-cooking oil copolymer form a highly efficient, sustainable and reusable sorbent to remove heavy metals from complex mixtures
Source: Royal Society of Chemistry journal article supplement (doi:10.1039/d5gc03769g), 2025-01-01
Supplement: d5gc03769g1.pdf [file d5gc03769g1.pdf]

Supplementary Material

**Nordic microalgae immobilized to a sulfur–cooking oil copolymer form a highly efficient, sustainable and reusable sorbent to remove heavy metals from complex mixtures**

Antonio Leon-Vaz<sup>1,2±</sup>, Martin Plöhn<sup>1±</sup>, Juan Cubero-Cardoso<sup>3,4,5</sup>, Juan Urbano<sup>3</sup> and Christiane Funk<sup>1\*</sup>

<sup>1</sup>Department of Chemistry, Umeå University, 901 87 Umeå, Sweden.  
[martin.ploehn@ezag.com](mailto:martin ploehn@ezag.com); [christiane.funk@umu.se](mailto:christiane.funk@umu.se)

<sup>2</sup>Laboratory of Biochemistry. Faculty of Experimental Sciences. Marine International Campus of Excellence and REMSMA. University of Huelva, 210071 Huelva, Spain.  
[antonio.leon@dqcm.uhu.es](mailto:antonio.leon@dqcm.uhu.es)

<sup>3</sup>Laboratory of Sustainable and Circular Technology. CIDERTA and Chemistry Department, Faculty of Experimental Sciences. Campus de “El Carmen”, University of Huelva, 21071 Huelva, Spain. [j.cubero@dqcm.uhu.es](mailto:j.cubero@dqcm.uhu.es); [juan.urbano@dqcm.uhu.es](mailto:juan.urbano@dqcm.uhu.es)

<sup>4</sup>Institute of Water Research, University of Granada, Granada 18071, Spain.

<sup>5</sup>Department of Microbiology, Pharmacy Faculty, University of Granada, Campus de Cartuja s/n, Granada 18011, Spain.

<sup>±</sup> These authors contributed equally to the work.

**\*Corresponding author:** Christiane Funk [christiane.funk@umu.se](mailto:christiane.funk@umu.se)

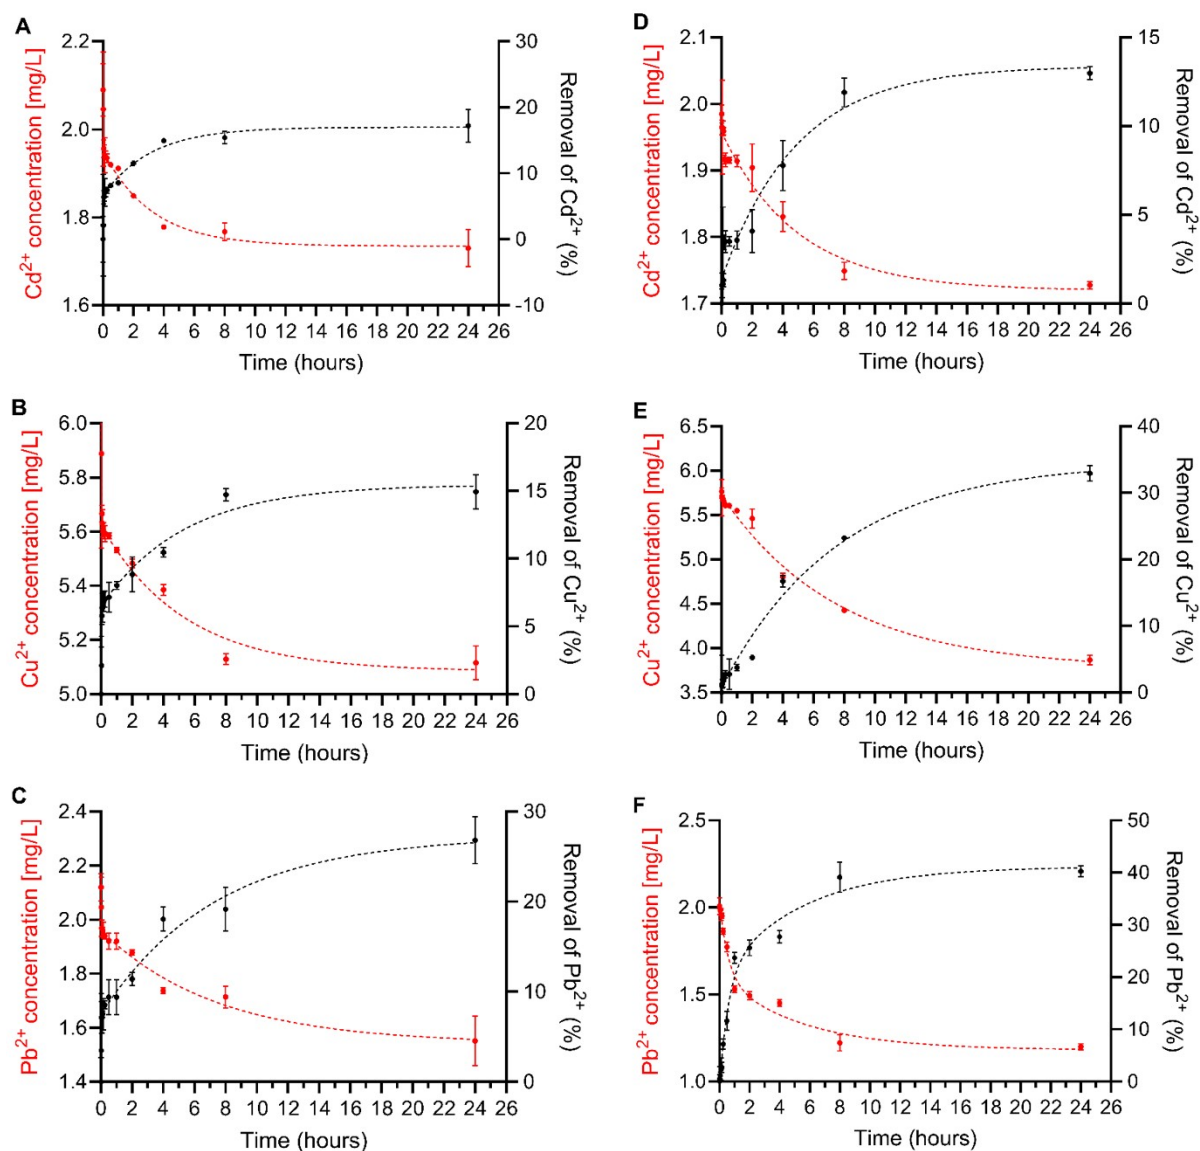

**Fig. S1.** Removal of 5 mg L<sup>-1</sup> Cd<sup>2+</sup>, 2 mg L<sup>-1</sup> Cu<sup>2+</sup> and 1.8 mg L<sup>-1</sup> Pb<sup>2+</sup> in a multi-elemental mixture by *Scotelliopsis reticulata* (UFA-2) in the absence of copolymer (A-C) and after immobilization to the copolymer (D-F). Mean  $\pm$  SD of three biological replicates. Dashed lines represent the fitted curves of two-phase association (black) and decay (red). Solid lines in D and E show the sigmoidal curve fitting for removal of the corresponding elements.

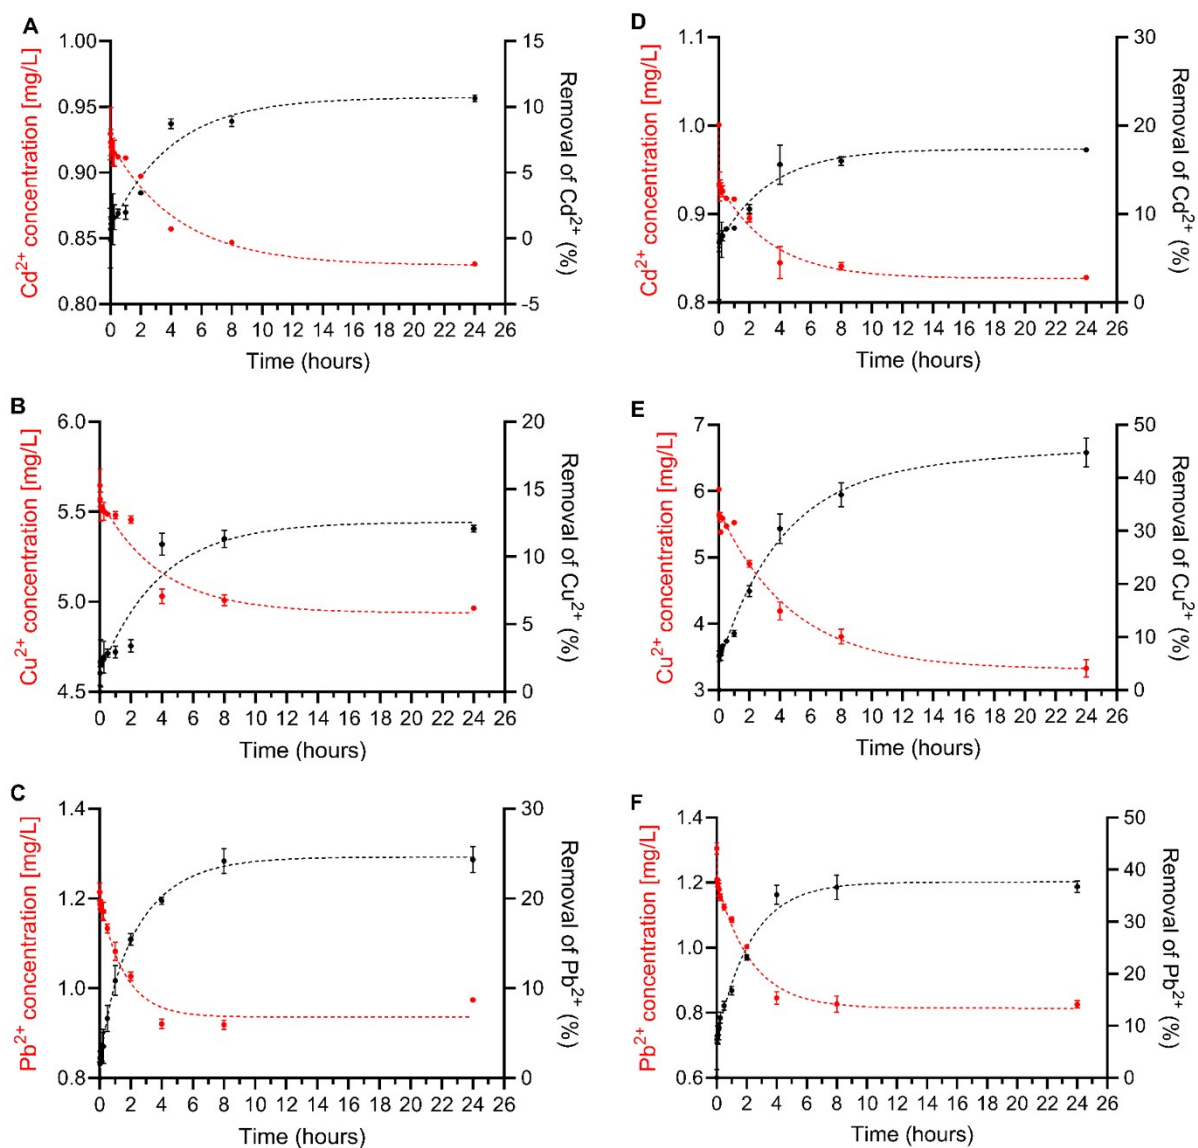

**Fig. S2.** Removal of 5 mg L<sup>-1</sup> Cd<sup>2+</sup>, 1 mg L<sup>-1</sup> Cu<sup>2+</sup> and 1 mg L<sup>-1</sup> Pb<sup>2+</sup> in a multi-elemental setup by *Scenedesmus obliquus* (13-8) in the absence of copolymer (A-C) and after immobilization on the copolymer (D-F). Mean  $\pm$  SD of three biological replicates. Dashed lines represent the fitted curves of two-phase association (black) and decay (red). Solid lines in D and E show the sigmoidal curve fitting for removal of the corresponding elements.

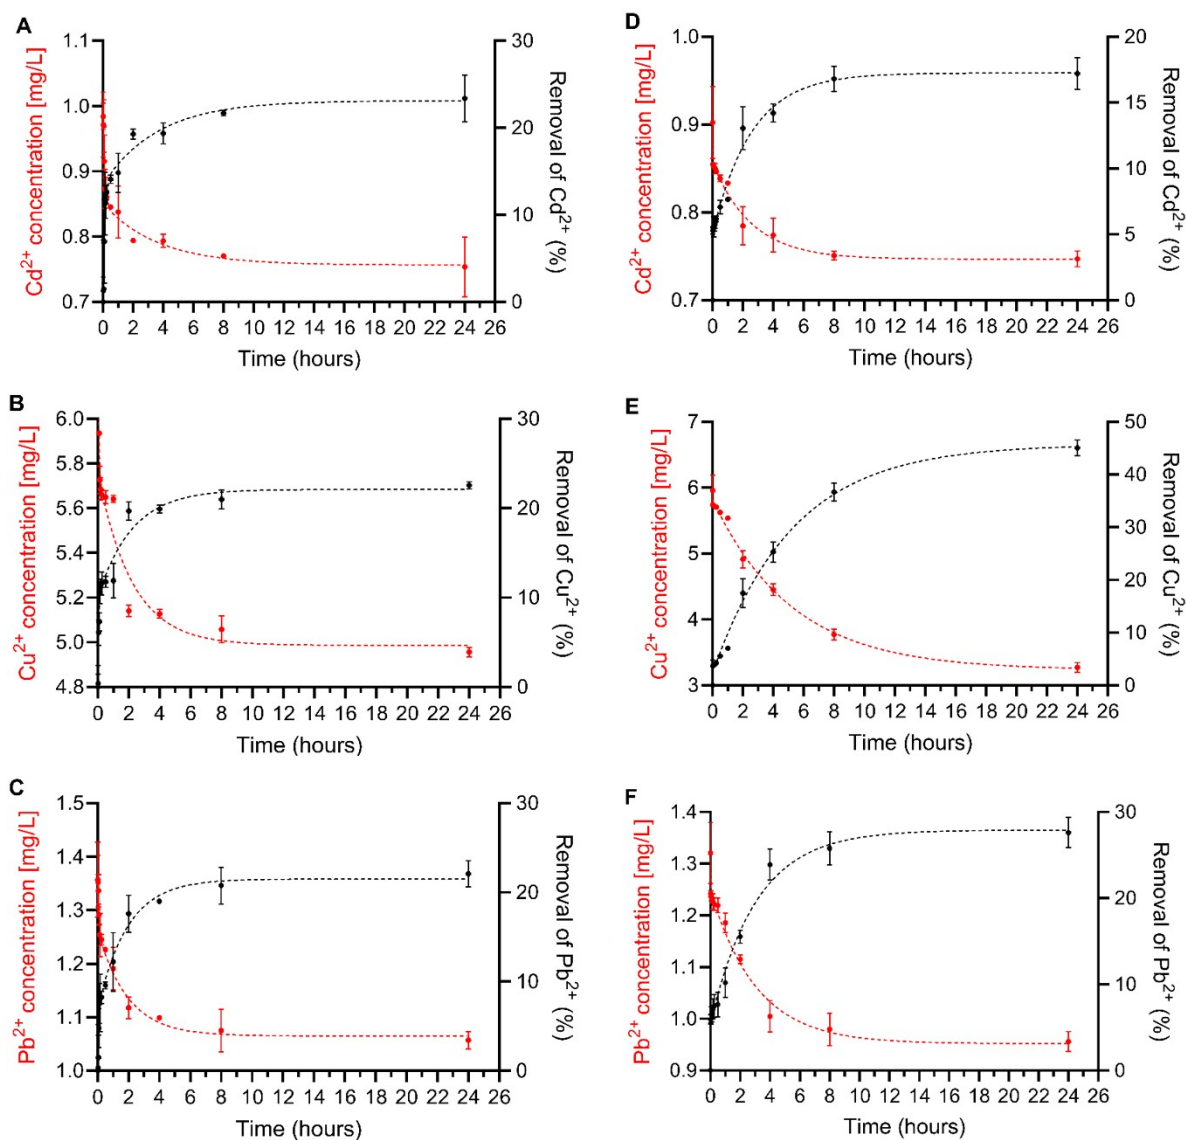

**Fig. S3.** Removal of  $5 \text{ mg L}^{-1} \text{ Cd}^{2+}$ ,  $1 \text{ mg L}^{-1} \text{ Cu}^{2+}$  and  $1 \text{ mg L}^{-1} \text{ Pb}^{2+}$  in a multi-elemental setup by *Microactinium* sp. (P9-1) in the absence of copolymer (A-C) and after immobilization on the copolymer (D-F). Mean  $\pm$  SD of three biological replicates. Dashed lines represent the fitted curves of two-phase association (black) and decay (red). Solid lines in D and E show the sigmoidal curve fitting for removal of the corresponding elements.

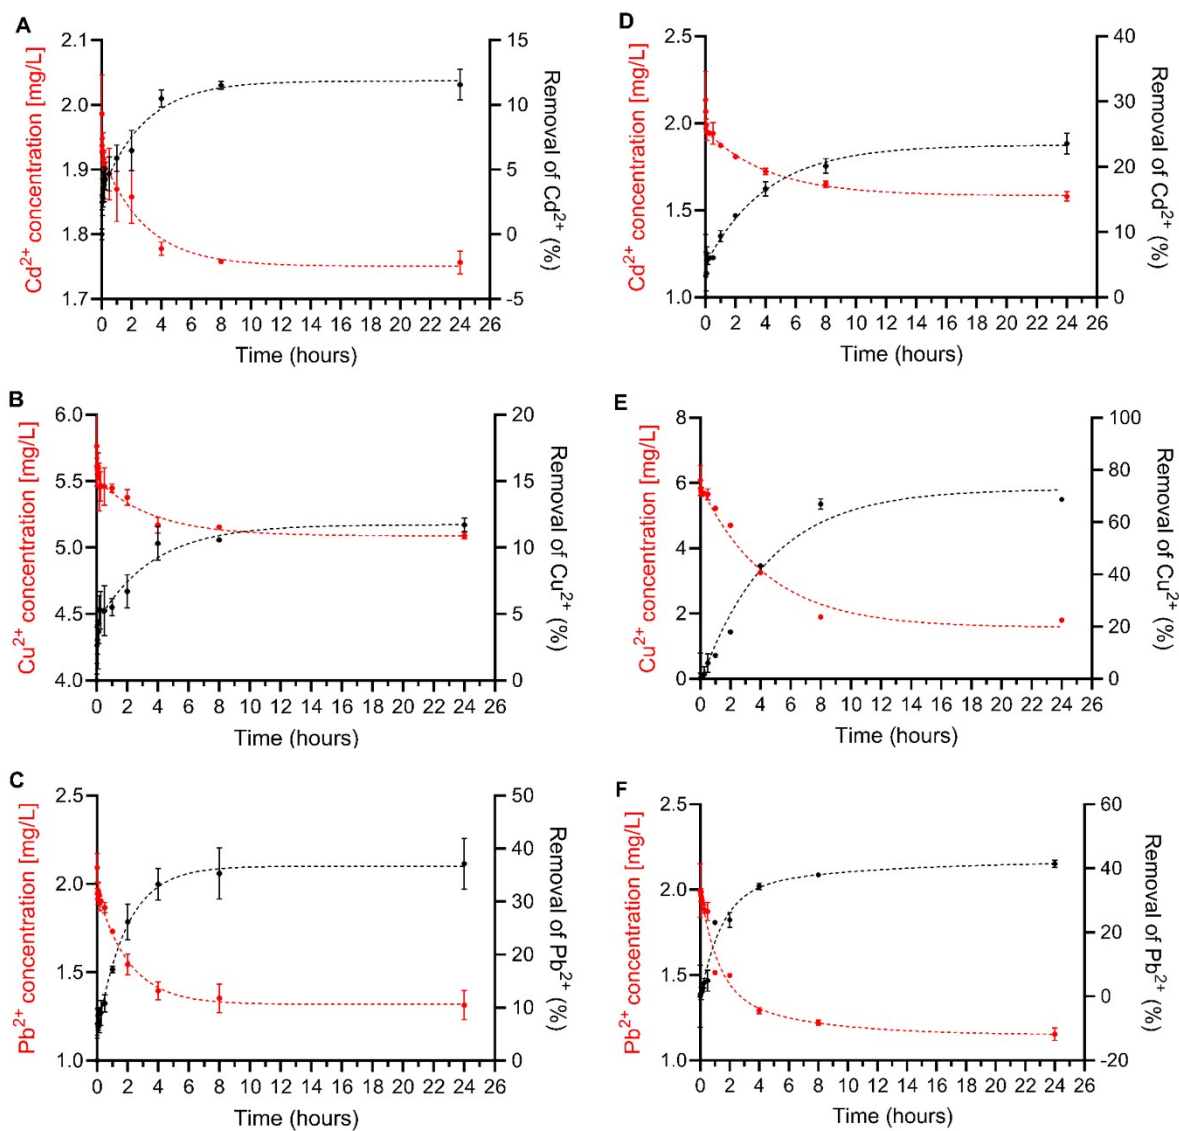

**Fig. S4.** Removal of 5 mg L<sup>-1</sup> Cd<sup>2+</sup>, 2 mg L<sup>-1</sup> Cu<sup>2+</sup> and 1.8 mg L<sup>-1</sup> Pb<sup>2+</sup> in a multi-elemental setup by *Coelastrella* sp. (3-4) in the absence of copolymer (A-C) and after immobilization on the copolymer (D-F). Mean  $\pm$  SD of three biological replicates. Dashed lines represent the fitted curves of two-phase association (black) and decay (red). Solid lines in D and E show the sigmoidal curve fitting for removal of the corresponding elements.

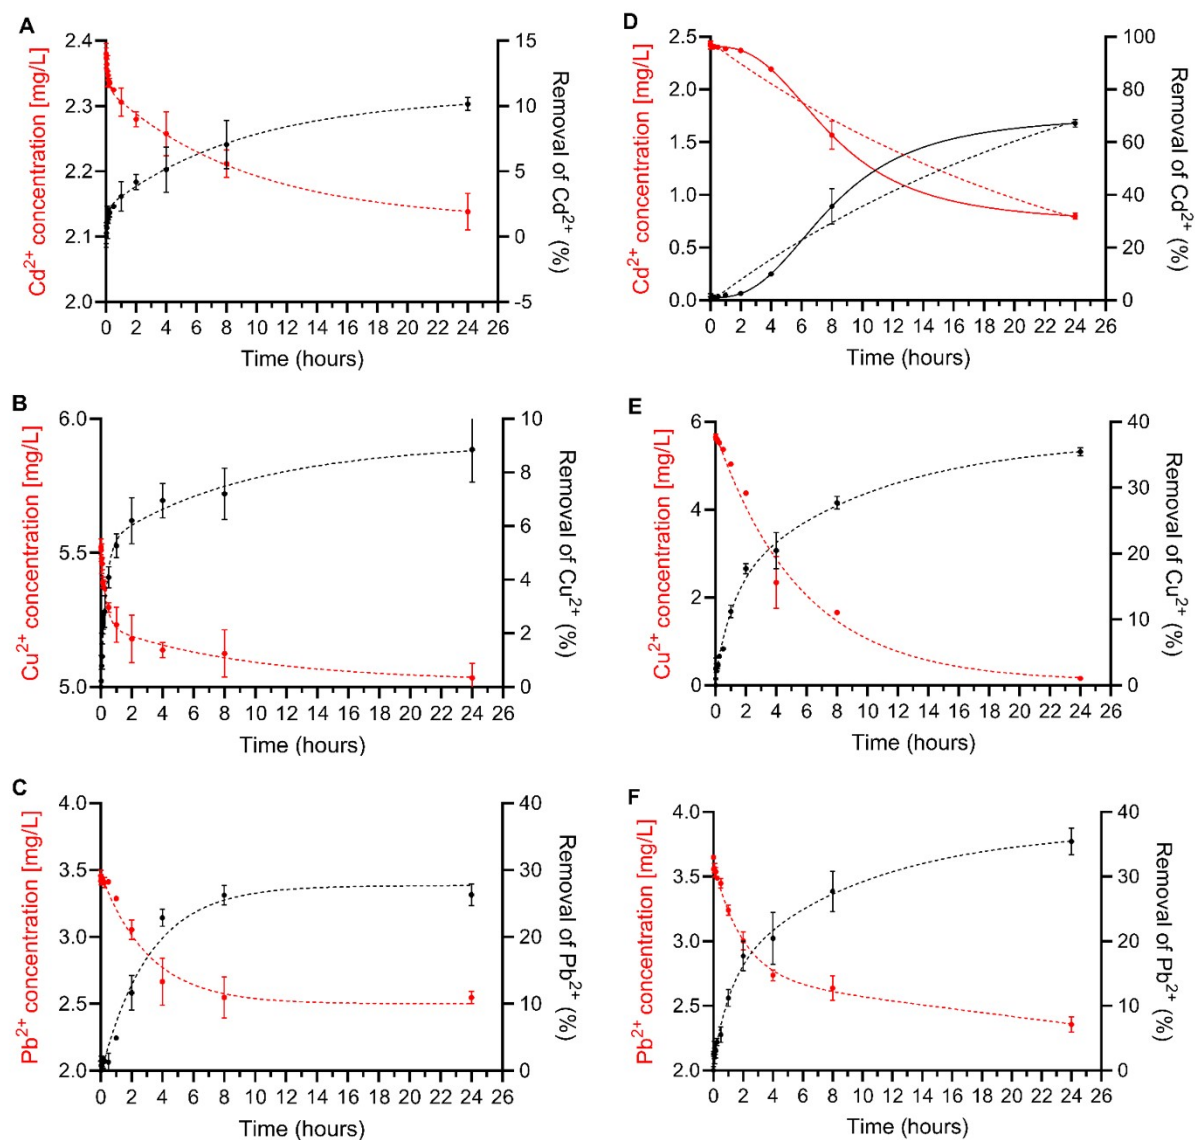

**Fig. S5.** Removal of  $5 \text{ mg L}^{-1} \text{ Cd}^{2+}$ ,  $2.5 \text{ mg L}^{-1} \text{ Cu}^{2+}$  and  $3.6 \text{ mg L}^{-1} \text{ Pb}^{2+}$  in a multi-elemental setup by *Chlorella sorokiniana* (2-21-1) in the absence of copolymer (A-C) and after immobilization on the copolymer (D-F). Mean  $\pm$  SD of three biological replicates. Dashed lines represent the fitted curves of two-phase association (black) and decay (red). Solid lines in D and E show the sigmoidal curve fitting for removal of the corresponding elements.

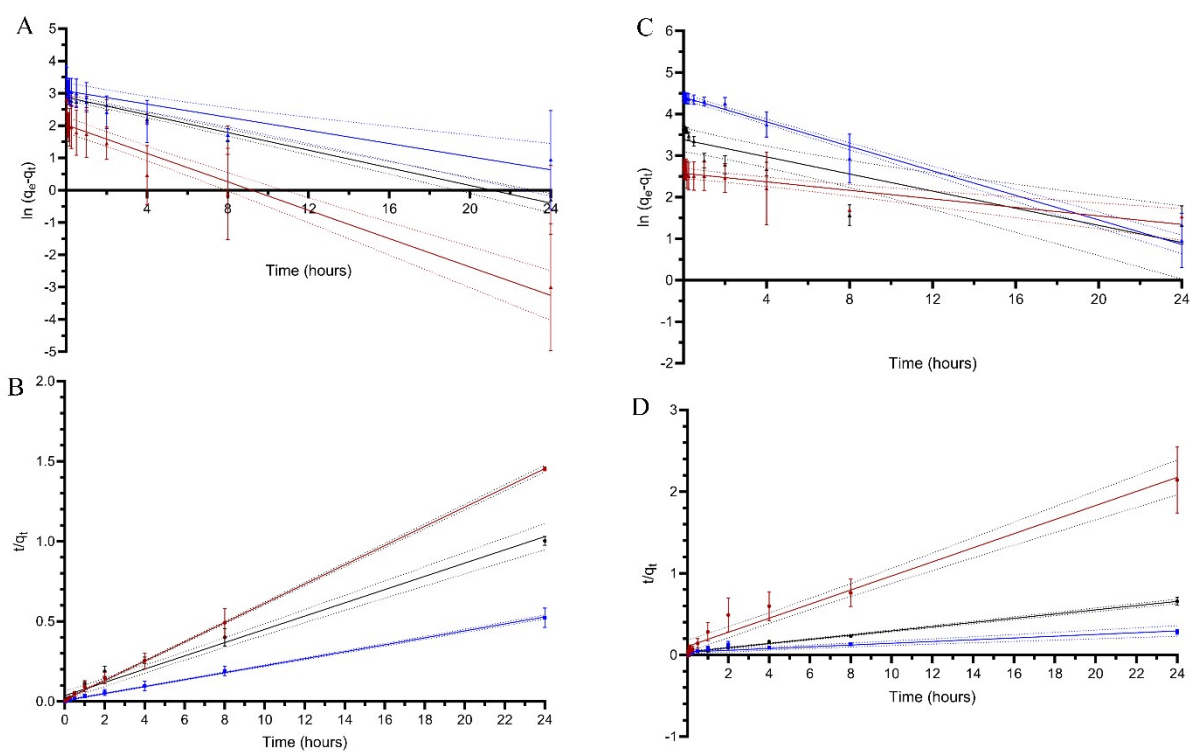

**Fig. S6.** Kinetic modeling of heavy metal removal for *Scotelliopsis reticulata* (UFA-2) (red: Cd<sup>2+</sup>; blue: Cu<sup>2+</sup>, black: Pb<sup>2+</sup>); data is presented as Mean  $\pm$  SD of three biological replicates. (A) Pseudo-first-order kinetics before immobilization; (B) pseudo-second order kinetics before immobilization. (C) Pseudo-first-order kinetics after immobilization; (D) pseudo-second order kinetics after immobilization.



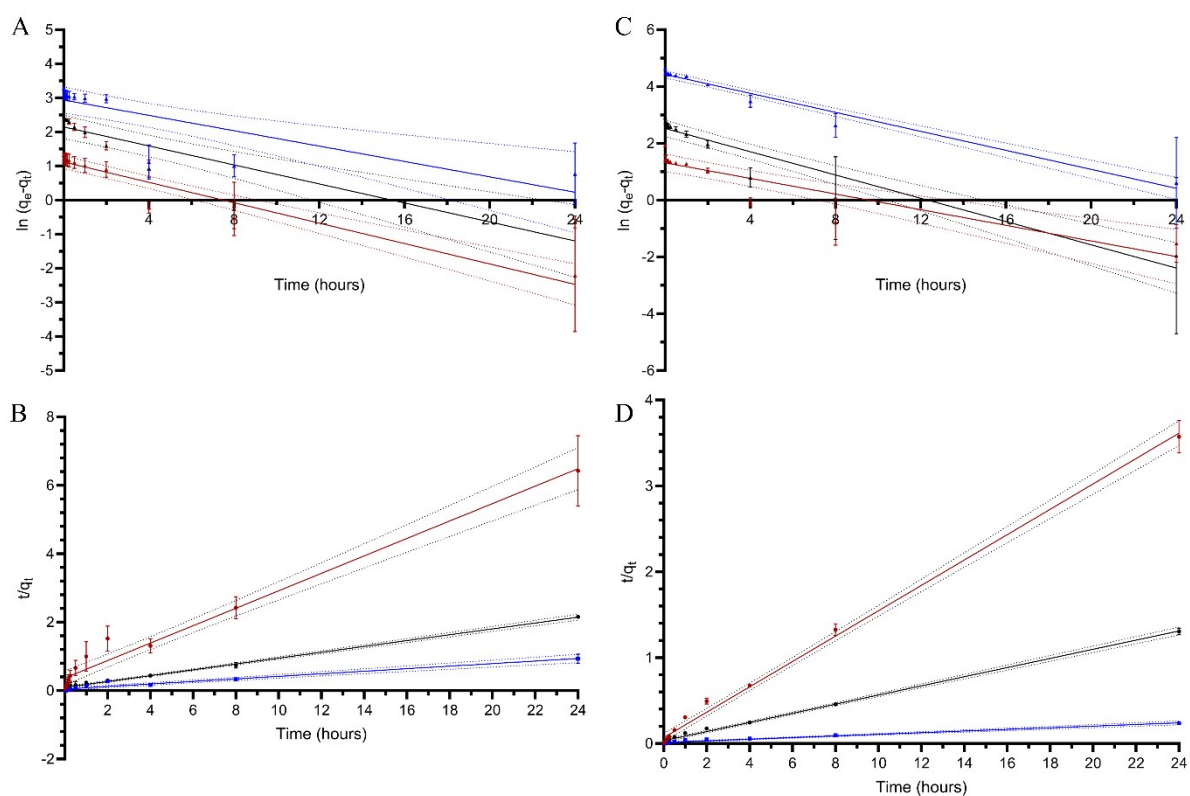

**Fig. S7.** Kinetic modeling of heavy metal removal for *Scenedesmus obliquus* (13-8) (red: Cd<sup>2+</sup>; blue: Cu<sup>2+</sup>, black: Pb<sup>2+</sup>); data is presented as Mean  $\pm$  SD of three biological replicates. (A) Pseudo-first-order kinetics before immobilization; (B) pseudo-second order kinetics before immobilization. (C) Pseudo-first-order kinetics after immobilization; (D) pseudo-second order kinetics after immobilization.



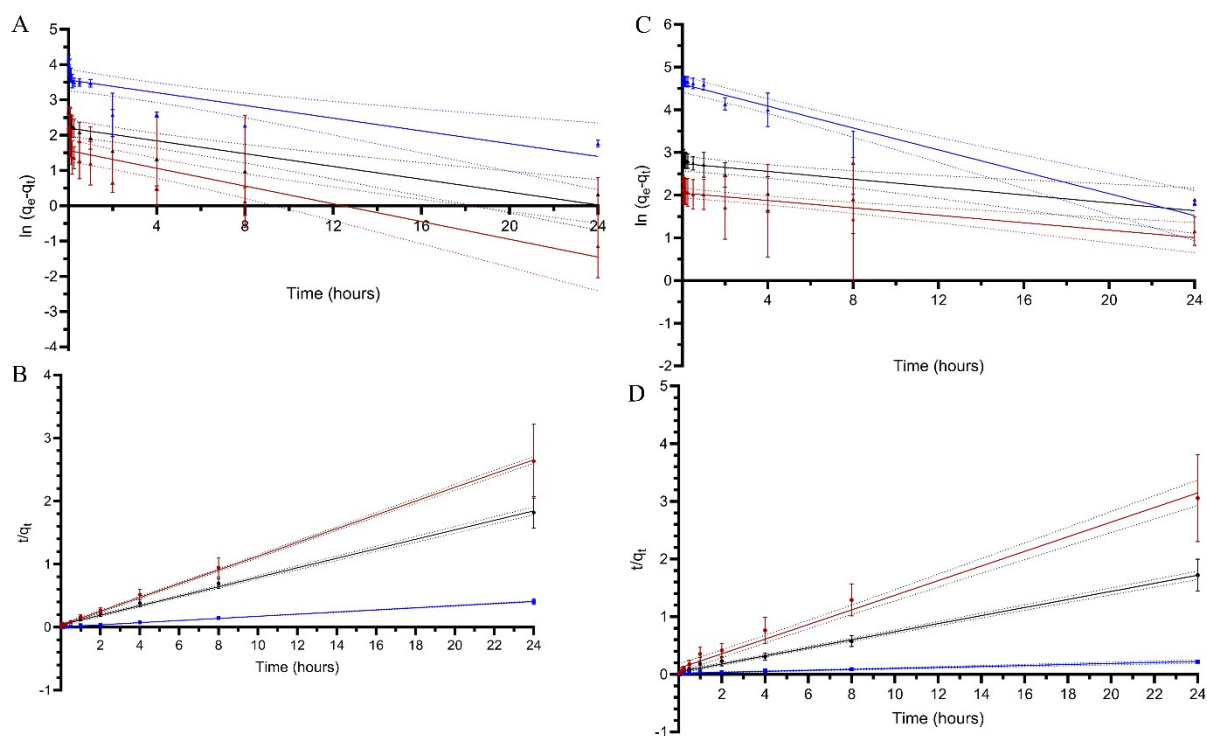

**Fig. S8.** Kinetic modeling of heavy metal removal for *Micractinium* sp. (P9-1) (red: Cd<sup>2+</sup>; blue: Cu<sup>2+</sup>, black: Pb<sup>2+</sup>); data is presented as Mean  $\pm$  SD of three biological replicates. **(A)** Pseudo-first-order kinetics before immobilization; **(B)** pseudo-second order kinetics before immobilization. **(C)** Pseudo-first-order kinetics after immobilization; **(D)** pseudo-second order kinetics after immobilization.

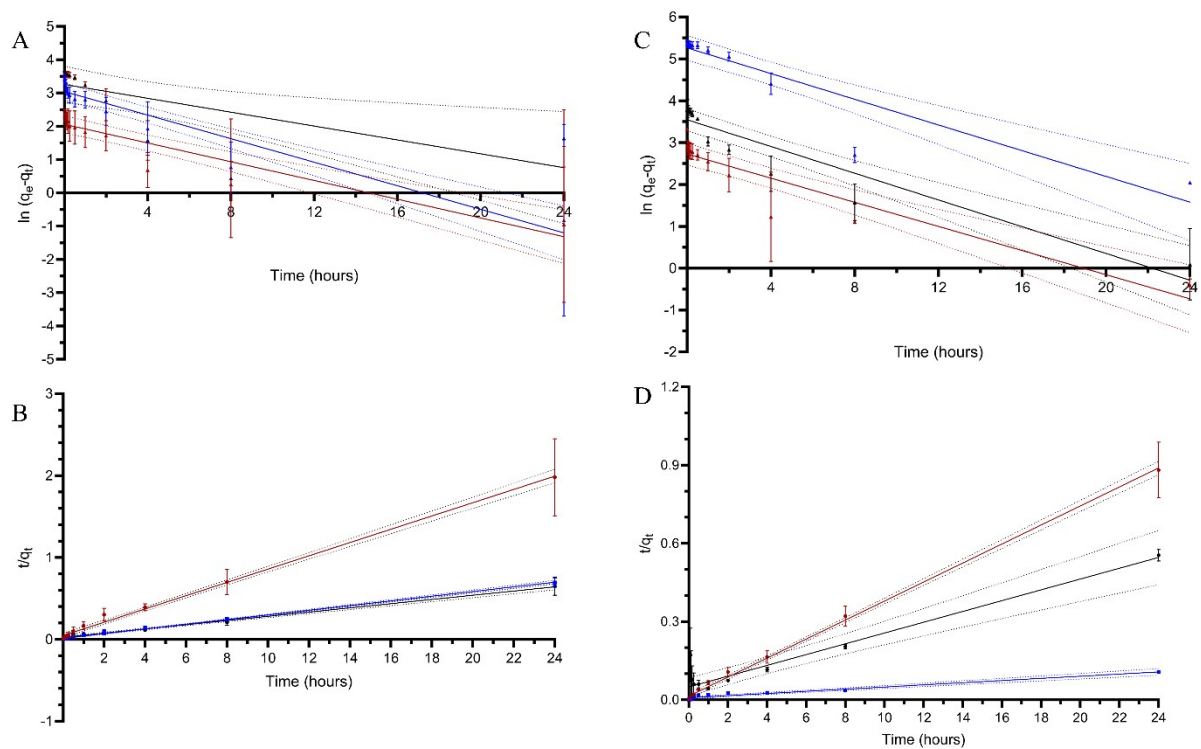

**Fig. S9.** Kinetic modeling of heavy metal removal for *Coelastrella* sp. (3-4) (red: Cd<sup>2+</sup>; blue: Cu<sup>2+</sup>, black: Pb<sup>2+</sup>); data is presented as Mean  $\pm$  SD of three biological replicates. **(A)** Pseudo-first-order kinetics before immobilization; **(B)** pseudo-second order kinetics before immobilization. **(C)** Pseudo-first-order kinetics after immobilization; **(D)** pseudo-second order kinetics after immobilization.

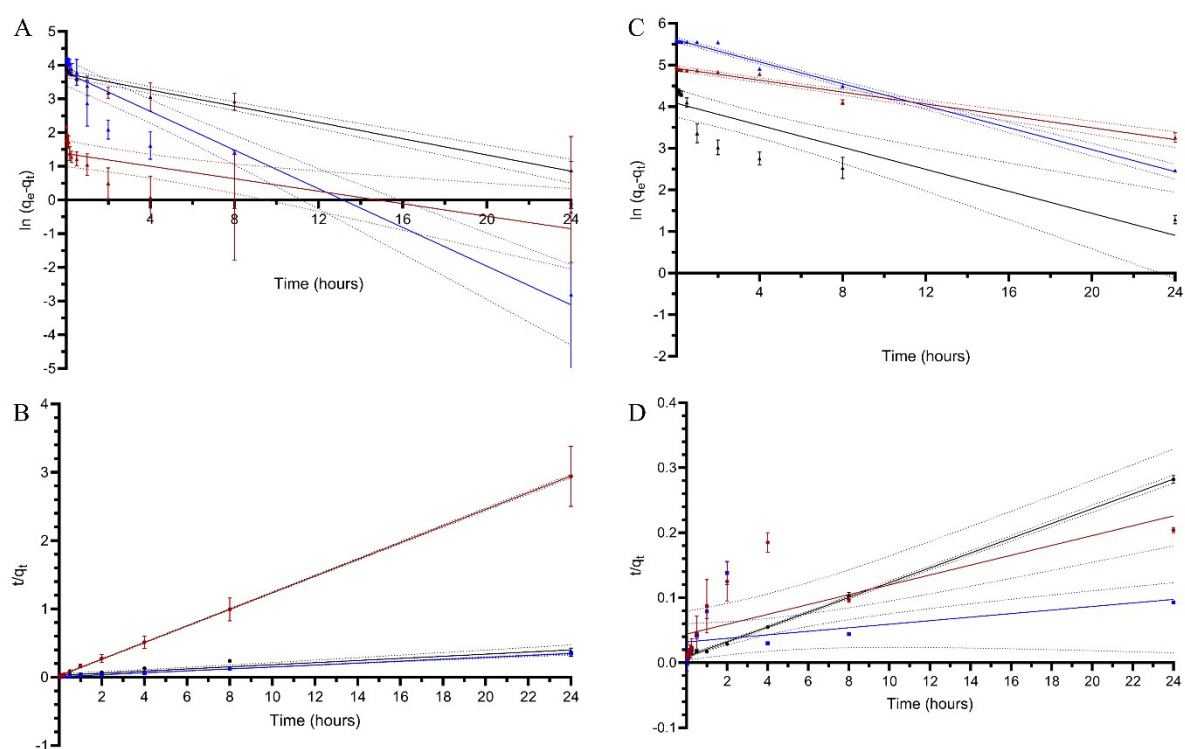

**Fig. S10.** Kinetic modeling of heavy metal removal by *Chlorella vulgaris* (13-1) (red: Cd<sup>2+</sup>; blue: Cu<sup>2+</sup>, black: Pb<sup>2+</sup>); data is presented as Mean  $\pm$  SD of three biological replicates. **(A)** Pseudo-first-order kinetics before immobilization; **(B)** pseudo-second order kinetics before immobilization. **(C)** Pseudo-first-order kinetics after immobilization; **(D)** pseudo-second order kinetics after immobilization.

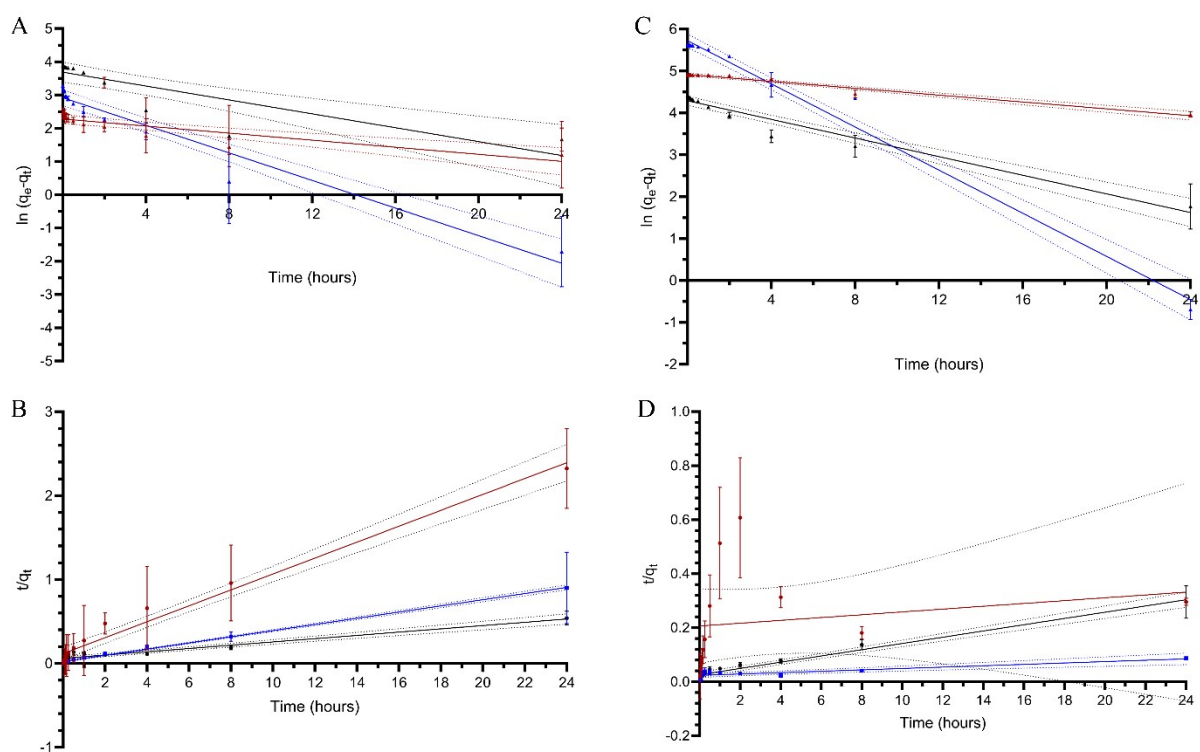

**Fig. S11.** Kinetic modeling of heavy metal removal for *Chlorella sorokiniana* (2-21-1) (red: Cd<sup>2+</sup>; blue: Cu<sup>2+</sup>, black: Pb<sup>2+</sup>); data is presented as Mean  $\pm$  SD of three biological replicates. **(A)** Pseudo-first-order kinetics before immobilization; **(B)** pseudo-second order kinetics before immobilization. **(C)** Pseudo-first-order kinetics after immobilization; **(D)** pseudo-second order kinetics after immobilization.

**Table S1. Heavy metal concentrations in the mixtures applied to different microalgal strains**

| Heavy metal mix | Applied to strain                       | Concentration [mg L <sup>-1</sup> ] |                  |                  |
|-----------------|-----------------------------------------|-------------------------------------|------------------|------------------|
|                 |                                         | Cu <sup>2+</sup>                    | Cd <sup>2+</sup> | Pb <sup>2+</sup> |
| High (H)        | <i>Chlorella vulgaris</i> (13-1)        | 5                                   | 2.5              | 3.6              |
|                 | <i>Chlorella sorokiniana</i> (2-21-1)   |                                     |                  |                  |
| Medium (M)      | <i>Coelastrrella</i> sp. (3-4)          | 5                                   | 2                | 1.8              |
|                 | <i>Scotelliopsis reticulata</i> (UFA-2) |                                     |                  |                  |
| Low (L)         | <i>Scenedesmus obliquus</i> (13-8)      | 5                                   | 1                | 1                |
|                 | <i>Micractinium</i> sp. (P9-1)          |                                     |                  |                  |

**Table S2.** Removal of Cd<sup>2+</sup>, Cu<sup>2+</sup> and Pb<sup>2+</sup> in a multi-elemental mixture under equilibrium conditions calculated with the Freundlich and the Dubinin-Radushkevich model. Data presented for 5 Nordic microalgae and the copolymer individually as well as after immobilization.

| Strain                                             | HM               | Freundlich                           |                |                | Dubinin-Radushkevich                   |                                                     |                |
|----------------------------------------------------|------------------|--------------------------------------|----------------|----------------|----------------------------------------|-----------------------------------------------------|----------------|
|                                                    |                  | K <sub>F</sub> (mg g <sup>-1</sup> ) | n <sub>F</sub> | R <sup>2</sup> | q <sub>max</sub> (mg g <sup>-1</sup> ) | K <sub>DR</sub> (mol <sup>2</sup> J <sup>-2</sup> ) | R <sup>2</sup> |
| Copolymer alone (CP)                               | Cd <sup>2+</sup> | 0.14                                 | 1.80           | 0.991          | 0.76                                   | 3.83E-06                                            | 0.869          |
|                                                    | Cu <sup>2+</sup> | 0.09                                 | 1.02           | 0.930          | 1.11                                   | 4.34E-06                                            | 0.957          |
|                                                    | Pb <sup>2+</sup> | 0.13                                 | 1.24           | 0.973          | 1.82                                   | 9.61E-06                                            | 0.967          |
| <i>Scotelliopsis reticulata</i><br>(UFA-2)         | Cd <sup>2+</sup> | 9.51                                 | 2.61           | 0.887          | 27.39                                  | 6.01E-06                                            | 0.955          |
|                                                    | Cu <sup>2+</sup> | 9.37                                 | 1.40           | 0.944          | 57.86                                  | 2.54E-06                                            | 0.837          |
|                                                    | Pb <sup>2+</sup> | 31.14                                | 1.24           | 0.936          | 431.80                                 | 9.43E-06                                            | 0.975          |
| <i>Scotelliopsis reticulata</i><br>(UFA-2)<br>+ CP | Cd <sup>2+</sup> | 36.59                                | 1.69           | 0.895          | 243.20                                 | 4.59E-06                                            | 0.977          |
|                                                    | Cu <sup>2+</sup> | 35.58                                | 1.05           | 0.956          | 372.30                                 | 3.03E-06                                            | 0.978          |
|                                                    | Pb <sup>2+</sup> | *                                    | *              | *              | 1044.00                                | 3.67E-06                                            | 0.961          |
| <i>Scenedesmus obliquus</i><br>(13-8)              | Cd <sup>2+</sup> | 18.96                                | 3.60           | 0.962          | 36.62                                  | 1.86E-07                                            | 0.658          |
|                                                    | Cu <sup>2+</sup> | 17.25                                | 1.16           | 0.947          | 153.00                                 | 2.91E-06                                            | 0.963          |
|                                                    | Pb <sup>2+</sup> | 17.89                                | 1.08           | 0.971          | 368.40                                 | 1.22E-05                                            | 0.979          |
| <i>Scenedesmus obliquus</i><br>(13-8)<br>+ CP      | Cd <sup>2+</sup> | 13.10                                | 1.84           | 0.975          | 71.38                                  | 3.87E-06                                            | 0.891          |
|                                                    | Cu <sup>2+</sup> | *                                    | *              | *              | 171.20                                 | 3.53E-07                                            | 0.976          |
|                                                    | Pb <sup>2+</sup> | 33.00                                | 1.27           | 0.899          | 426.40                                 | 8.68E-06                                            | 0.969          |
| <i>Coelastrella</i> sp.<br>(3-4)                   | Cd <sup>2+</sup> | 11.17                                | 2.51           | 0.965          | 33.81                                  | 8.88E-07                                            | 0.850          |
|                                                    | Cu <sup>2+</sup> | 14.72                                | 1.06           | 0.919          | 171.10                                 | 3.99E-06                                            | 0.946          |
|                                                    | Pb <sup>2+</sup> | 26.30                                | 1.52           | 0.994          | 202.50                                 | 4.99E-06                                            | 0.912          |
| <i>Coelastrella</i> sp.<br>(3-4)<br>+ CP           | Cd <sup>2+</sup> | 30.75                                | 2.61           | 0.988          | 94.48                                  | 1.59E-06                                            | 0.735          |
|                                                    | Cu <sup>2+</sup> | *                                    | *              | *              | 278.50                                 | 5.35E-07                                            | 0.963          |
|                                                    | Pb <sup>2+</sup> | 37.00                                | 1.29           | 0.941          | 412.00                                 | 6.66E-06                                            | 0.982          |
| <i>Chlorella vulgaris</i><br>(13-1)                | Cd <sup>2+</sup> | 18.41                                | 2.93           | 0.960          | 44.04                                  | 3.35E-07                                            | 0.877          |
|                                                    | Cu <sup>2+</sup> | *                                    | *              | *              | 169.80                                 | 7.83E-06                                            | 0.883          |
|                                                    | Pb <sup>2+</sup> | 24.00                                | 2.05           | 0.958          | 101.10                                 | 2.24E-06                                            | 0.868          |
| <i>Chlorella vulgaris</i><br>(13-1)<br>+ CP        | Cd <sup>2+</sup> | 36.55                                | 3.19           | 0.959          | 78.48                                  | 2.17E-07                                            | 0.826          |
|                                                    | Cu <sup>2+</sup> | *                                    | *              | *              | 491.70                                 | 6.51E-06                                            | 0.947          |
|                                                    | Pb <sup>2+</sup> | *                                    | *              | *              | 446.60                                 | 7.59E-06                                            | 0.954          |
| <i>Chlorella sorokiniana</i><br>(2-21-1)           | Cd <sup>2+</sup> | 21.33                                | 2.58           | 0.929          | 60.76                                  | 5.73E-07                                            | 0.921          |
|                                                    | Cu <sup>2+</sup> | 13.62                                | 1.76           | 0.978          | 47.80                                  | 6.81E-07                                            | 0.892          |
|                                                    | Pb <sup>2+</sup> | 27.97                                | 1.32           | 0.906          | 333.20                                 | 7.89E-06                                            | 0.984          |
| <i>Chlorella sorokiniana</i><br>(2-21-1)<br>+ CP   | Cd <sup>2+</sup> | 19.19                                | 1.81           | 0.938          | 105.40                                 | 2.97E-06                                            | 0.972          |
|                                                    | Cu <sup>2+</sup> | *                                    | *              | *              | 230.50                                 | 6.34E-07                                            | 0.930          |
|                                                    | Pb <sup>2+</sup> | 29.00                                | 1.14           | 0.928          | 505.30                                 | 9.76E-06                                            | 0.994          |

\* prediction not possible

**Table S3.** Remaining removal rate of microalgal/copolymer sorbent after desorption of heavy metals with HNO<sub>3</sub> or EDTA (given as % of initial removal rate).

|                                                     | 0.1M HNO <sub>3</sub>      |                  |                  | 0.1M EDTA                  |                  |                  |
|-----------------------------------------------------|----------------------------|------------------|------------------|----------------------------|------------------|------------------|
|                                                     | % of previous removal rate |                  |                  | % of previous removal rate |                  |                  |
|                                                     | Cd <sup>2+</sup>           | Cu <sup>2+</sup> | Pb <sup>2+</sup> | Cd <sup>2+</sup>           | Cu <sup>2+</sup> | Pb <sup>2+</sup> |
| <b>Copolymer (CP) alone</b>                         | 62                         | 91               | 94               | 110                        | 90               | 94               |
| <b><i>Scotelliopsis reticulata</i> (UFA-2) + CP</b> | 72                         | 94               | 60               | 115                        | 99               | 98               |
| <b><i>Scenedesmus obliquus</i> (13-8) + CP</b>      | 59                         | 80               | 39               | 94                         | 99               | 82               |
| <b><i>Coelastrella</i> sp. (3-4) + CP</b>           | 90                         | 104              | 94               | 104                        | 106              | 105              |
| <b><i>Chlorella vulgaris</i> (13-1) + CP</b>        | 41                         | 71               | 64               | 84                         | 78               | 83               |
| <b><i>Chlorella sorokiniana</i> (2-21-1) + CP</b>   | 60                         | 73               | 97               | 84                         | 86               | 103              |
